# Supplementary material for: Correlative Light and Electron Microscopy (CLEM) Analysis of Nuclear Reorganization Induced by Clustered DNA Damage Upon Charged Particle Irradiation
Source: MDPI journal article supplement (doi:10.3390/ijms21061911), 2020-03-11
Supplement: s1 [file s1]

# Supplemental Movie SM1

- Stack of TEM images recorded from 31 serial thin sections of irradiated U2OS cell stained with ChromEMT. Selected frames of this stack are shown in Figure 3 and Figure S3. Scale bar corresponds to 5  $\mu\text{m}$ .

# Supplemental Movie SM2

- Tomographic reconstruction of chromatin organisation. The movie shows 2nm tomographic slices through the 250 nm thick section of cell nucleus of U2OS cell stained with ChromEMT . Notice the absence of distinguishable differences in chromatin organisation within the IRIF (outlined in white) and outside. Selected frames are shown in Figure 5. Scale bar corresponds to 500 nm.
